# Supplementary material for: Association of Sex With Adolescent Soccer Concussion Incidence and Characteristics
Source: PubMed Central journal article supplement (PMC8080231; doi:10.1001/jamanetworkopen.2021.8191), 2021-04-27
Supplement: jamanetwopen-e218191-s001.pdf [file jamanetwopen-e218191-s001.pdf]

## Supplementary Online Content

Bretzin AC, Covassin T, Wiebe DJ, Stewart W. Association of sex with adolescent soccer concussion incidence and characteristics. *JAMA Netw Open*. 2021;4(4):e218191. doi:10.1001/jamanetworkopen.2021.8191

**eFigure.** Kaplan-Meier Survival Curve Presenting the Proportion of Adolescent Soccer Athletes Not Authorized Clearance to Return to Unrestricted Activity

**This supplementary material has been provided by the authors to give readers additional information about their work.**

A.

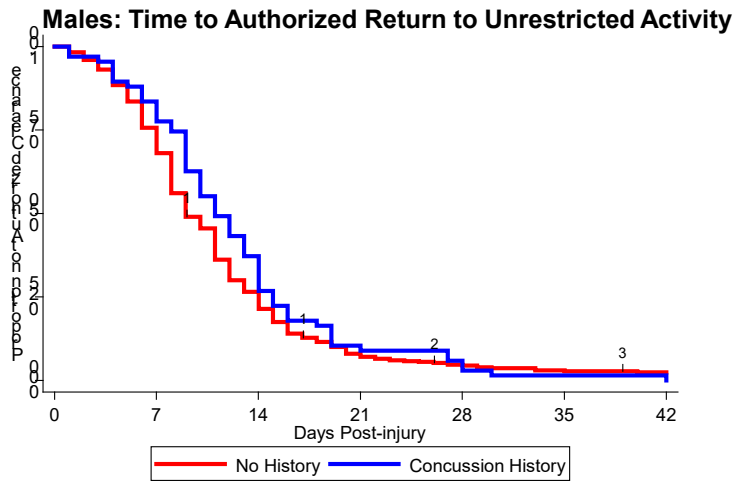

Number at Risk

|                    |     |     |     |    |    |    |   |
|--------------------|-----|-----|-----|----|----|----|---|
| Concussion History | 67  | 56  | 25  | 7  | 4  | 2  | 1 |
| No History         | 408 | 309 | 108 | 32 | 17 | 11 | 0 |

B.

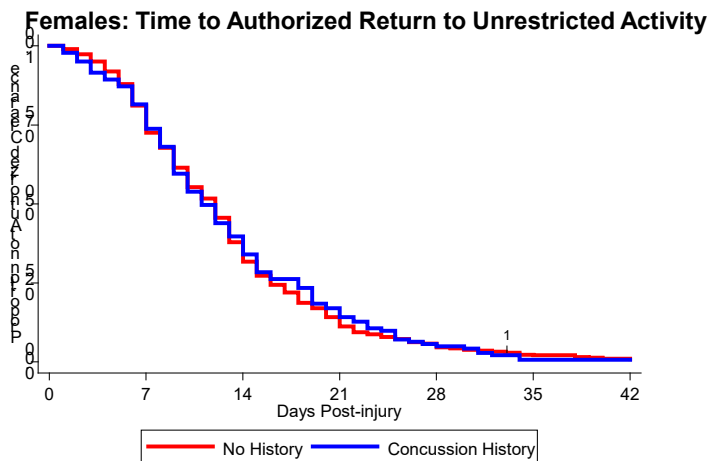

Number at Risk

|                    |     |     |     |    |    |    |   |
|--------------------|-----|-----|-----|----|----|----|---|
| Concussion History | 141 | 115 | 56  | 24 | 8  | 3  | 1 |
| No History         | 605 | 491 | 229 | 86 | 35 | 13 | 6 |

**eFigure 1: Kaplan-Meier survival curve presenting the proportion of adolescent soccer athletes not authorized clearance to return to unrestricted activity.**

**A)** Median time to return to activity for male athletes with a history of previous concussion was 11 (IQR 8 to 15) days compared to 9 (IQR 7 to 14) days for males without concussion history ( $p=0.023$ ; Peto test) **B)** Median time to return to activity for female athletes with a history of previous concussion was 11 (IQR 7 to 18) days compared to 12 (IQR 7 to 16) days for females without ( $p=0.928$ ; Peto test).
